# Supplementary material for: Interplay of Helicobacter pylori, fibroblasts, and cancer cells induces fibroblast activation and serpin E1 expression by cancer cells to promote gastric tumorigenesis
Source: Springer Nature journal article supplement (doi:10.1186/s12967-022-03537-x), 2022-07-21
Supplement: MOESM1 [file 23291226]

**Figure S1.** Western blot shows  $\alpha$ -SMA expression in the direct and Transwell (indirect) co-culture of *H. pylori*, NFs, and AGS cells for 6 h, 72 h, and 7 days at a multiplicity of infection (MOI) of 50. The bar graph shows the quantitation of  $\alpha$ -SMA levels.

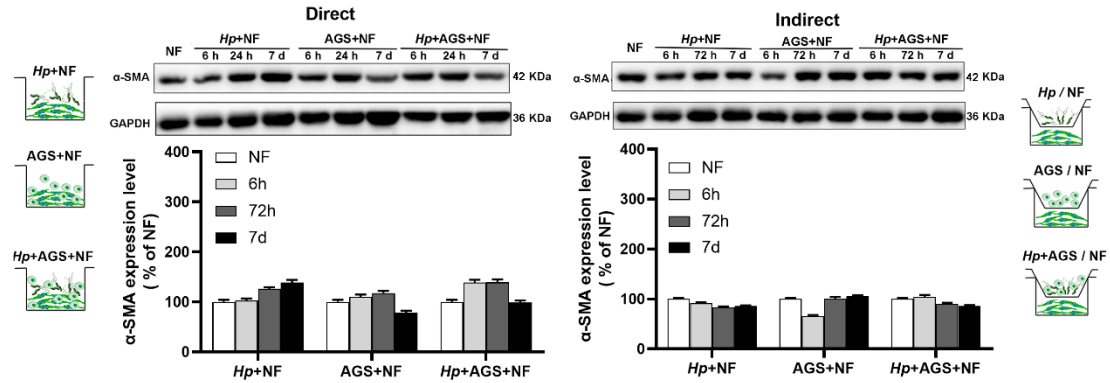

**Figure S2.** *H. pylori* were present at the cell surface of AGS, CAF, and NF cells infected with *H. pylori* for 7 days via confocal immunofluorescence (A) and the expression of urease B (B), a subunit of urease enzyme generated by *H. pylori*. Free *H. pylori* were removed via washing with PBS at 6 hours after infection.

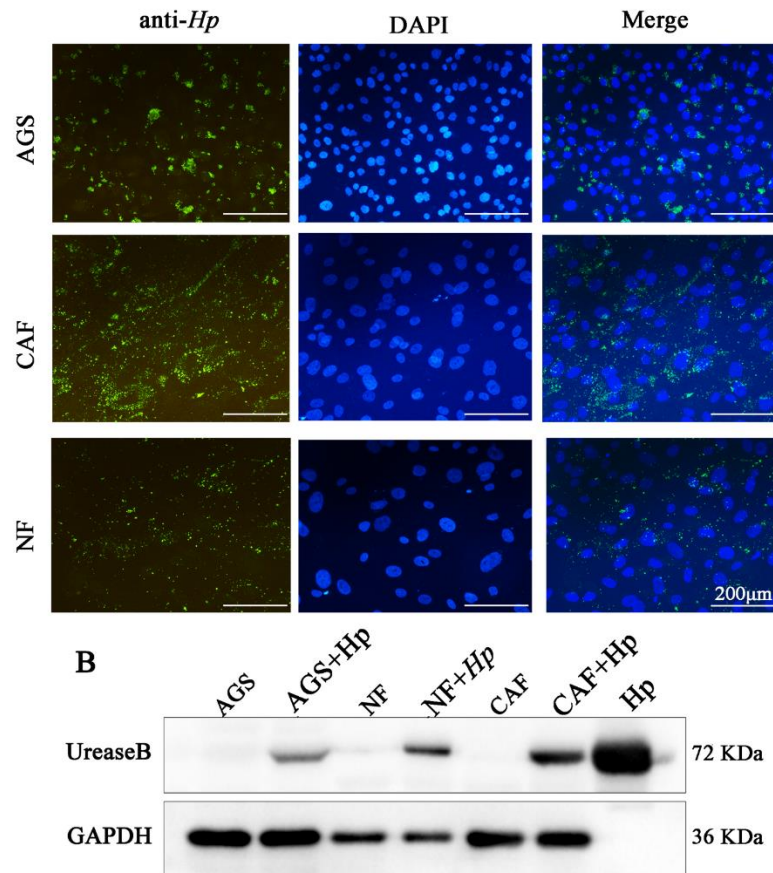

**Figure S3.** Primary gastric cancer cells were isolated from gastric cancer tissues and

identified by CK-18 and CEA immunohistochemistry staining, soft agar colony formation, and tumor formation in nude mice.

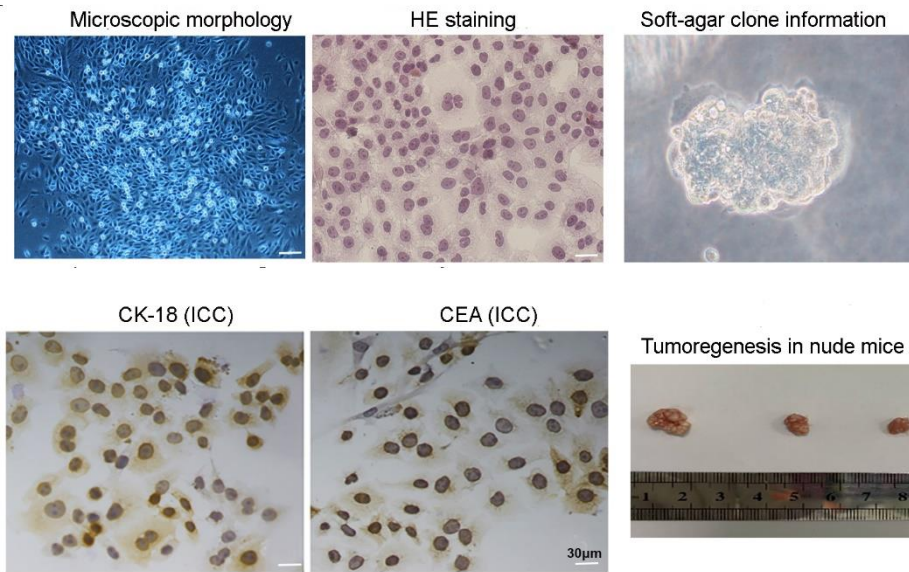

**Table S1. Human Cytokine Array List**

**Human Cytokine Array Coordinates**

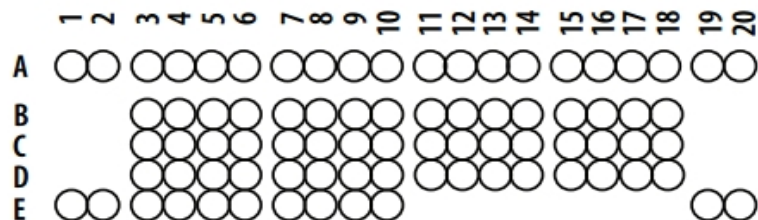

| Coordinate      | Target/Control   | Entrez Gene ID | Alternate Nomenclature    |
|-----------------|------------------|----------------|---------------------------|
| <b>E19, E20</b> | Negative Control | N/A            | -                         |
| <b>A1, A2</b>   | Reference Spots  | N/A            | -                         |
| <b>A19, A20</b> | Reference Spots  | N/A            | -                         |
| <b>E1, E2</b>   | Reference Spots  | N/A            | -                         |
| <b>A3, A4</b>   | CCL1             | 6346           | P500, SCYA1, SCYA2, TCA-3 |
| <b>A5, A6</b>   | CCL2             | 6347           | MCAF                      |
| <b>A7, A8</b>   | MIP-1 $\alpha$   | 6348/6351      | CCL3/CCL4                 |
| <b>A9, A10</b>  | CCL5             | 6352           | -                         |
| <b>A11, A12</b> | CD40 Ligand      | 959            | CD154, CD40LG, gp39, TRAP |
| <b>A13, A14</b> | Component C5     | 727            | C5/C5a                    |
| <b>A15, A16</b> | CXCL1            | 2919           | CINC-1, KC                |
| <b>A17, A18</b> | CXCL10           | 3627           | CRG-2                     |
| <b>B3, B4</b>   | CXCL11           | 6373           | $\beta$ -R1, H174         |
| <b>B5, B6</b>   | CXCL12           | 6387           | PBSF                      |

|                 |                |           |                      |
|-----------------|----------------|-----------|----------------------|
| <b>B7, B8</b>   | G-CSF          | 1440      | CSF $\beta$ , CSF-3  |
| <b>B9, B10</b>  | GM-CSF         | 1437      | CSF $\alpha$ , CSF-2 |
| <b>B11, B12</b> | ICAM-1         | 3383      | -                    |
| <b>B13, B14</b> | IFN- $\gamma$  | 3458      | Type II IFN          |
| <b>B15, B16</b> | IL-1 $\alpha$  | 3552      | -                    |
| <b>B17, B18</b> | IL-1 $\beta$   | 3553      | -                    |
| <b>C3, C4</b>   | IL-1ra         | 3557      | -                    |
| <b>C5, C6</b>   | IL-2           | 3558      | TCGF                 |
| <b>C7, C8</b>   | IL-4           | 3565      | BCDF, BSF1           |
| <b>C9, C10</b>  | IL-5           | 3567      | -                    |
| <b>C11, C12</b> | IL-6           | 3569      | BSF-2                |
| <b>C13, C14</b> | IL-8           | 3576      | CXCL8, GCP1, NAP1    |
| <b>C15, C16</b> | IL-10          | 3586      | CSIF                 |
| <b>C17, C18</b> | IL-12 p70      | 3592/3593 | CLMF p35             |
| <b>D3, D4</b>   | IL-13          | 3596      | -                    |
| <b>D5, D6</b>   | IL-16          | 3603      | LCF                  |
| <b>D7, D8</b>   | IL-17A         | 3605      | CTLA-8               |
| <b>D9, D10</b>  | IL-17E         | 64806     | IL-25                |
| <b>D11, D12</b> | IL-18          | 3606      | IGIF                 |
| <b>D13, D14</b> | IL-21          | 59067     | -                    |
| <b>D15, D16</b> | IL-27          | 246778    | IL-27 A              |
| <b>D17, D18</b> | IL-32 $\alpha$ | 9235      | -                    |
| <b>E3, E4</b>   | MIF            | 4282      | GIF, DER6            |
| <b>E5, E6</b>   | Serpin E1      | 5054      | Nexin, PLANH1        |
| <b>E7, E8</b>   | TNF- $\alpha$  | 7124      | TNFSF1A              |
| <b>E9, E10</b>  | TREM-1         | 54210     | CD354                |

**Table S2. Characteristics of 161 differentially expressed genes between CAFs and NFs**

| N  | Gene Symbol | Log2FC<br>(CAF/NF)<br>mean | pvalue | FDR    | Regulation |
|----|-------------|----------------------------|--------|--------|------------|
| 1  | IL33        | 4.86                       | 0.0270 | 0.0350 | UP         |
| 2  | ELN         | 3.97                       | 0.0301 | 0.0370 | UP         |
| 3  | PDK4        | 3.64                       | 0.0217 | 0.0315 | UP         |
| 4  | GALNT15     | 3.25                       | 0.0272 | 0.0350 | UP         |
| 5  | APCDD1L     | 3.04                       | 0.0003 | 0.0095 | UP         |
| 6  | LXN         | 3.04                       | 0.0262 | 0.0346 | UP         |
| 7  | KYNU        | 2.98                       | 0.0060 | 0.0179 | UP         |
| 8  | PCDH7       | 2.93                       | 0.0125 | 0.0234 | UP         |
| 9  | ACKR3       | 2.91                       | 0.0295 | 0.0370 | UP         |
| 10 | AOC3        | 2.89                       | 0.0333 | 0.0394 | UP         |
| 11 | PTGFR       | 2.82                       | 0.0289 | 0.0366 | UP         |
| 12 | LUM         | 2.8                        | 0.0020 | 0.0112 | UP         |
| 13 | AKR1C2      | 2.79                       | 0.0338 | 0.0397 | UP         |
| 14 | MGP         | 2.76                       | 0.0443 | 0.0466 | UP         |
| 15 | COL3A1      | 2.68                       | 0.0426 | 0.0457 | UP         |
| 16 | DPP4        | 2.65                       | 0.0498 | 0.0498 | UP         |
| 17 | ADAM12      | 2.63                       | 0.0165 | 0.0268 | UP         |
| 18 | MT1M        | 2.59                       | 0.0260 | 0.0346 | UP         |
| 19 | S100A4      | 2.53                       | 0.0354 | 0.0401 | UP         |
| 20 | AKR1C1      | 2.51                       | 0.0254 | 0.0346 | UP         |
| 21 | ISLR        | 2.41                       | 0.0019 | 0.0112 | UP         |
| 22 | LRRK2       | 2.36                       | 0.0387 | 0.0427 | UP         |

| N  | Gene Symbol | Log2FC<br>(CAF/NF)<br>mean | pvalue | FDR    | Regulation |
|----|-------------|----------------------------|--------|--------|------------|
| 23 | CPE         | 2.21                       | 0.0184 | 0.0285 | UP         |
| 24 | SELENOP     | 2.21                       | 0.0430 | 0.0458 | UP         |
| 25 | SPARC       | 2.21                       | 0.0132 | 0.0242 | UP         |
| 26 | MEGF9       | 2.15                       | 0.0058 | 0.0177 | UP         |
| 27 | ABHD5       | 2.11                       | 0.0014 | 0.0112 | UP         |
| 28 | INSIG1      | 2.08                       | 0.0096 | 0.0212 | UP         |
| 29 | SSH2        | 2.00                       | 0.0206 | 0.0307 | UP         |
| 30 | IL18        | 1.99                       | 0.0224 | 0.0322 | UP         |
| 31 | AGTR1       | 1.97                       | 0.0087 | 0.0205 | UP         |
| 32 | CHRM2       | 1.94                       | 0.0474 | 0.0480 | UP         |
| 33 | SAA1        | 1.92                       | 0.0114 | 0.0231 | UP         |
| 34 | FBN1        | 1.91                       | 0.0079 | 0.0203 | UP         |
| 35 | PDE1A       | 1.91                       | 0.0210 | 0.0310 | UP         |
| 36 | PTN         | 1.9                        | 0.0028 | 0.0124 | UP         |
| 37 | CRYBG3      | 1.88                       | 0.0139 | 0.0246 | UP         |
| 38 | PLA2R1      | 1.82                       | 0.0085 | 0.0205 | UP         |
| 39 | VCAN        | 1.81                       | 0.0088 | 0.0205 | UP         |
| 40 | COL4A5      | 1.79                       | 0.0310 | 0.0378 | UP         |
| 41 | KCNK1       | 1.76                       | 0.0008 | 0.0112 | UP         |
| 42 | ATL1        | 1.70                       | 0.0001 | 0.0061 | UP         |
| 43 | TNFAIP8L3   | 1.63                       | 0.0024 | 0.0117 | UP         |
| 44 | FAP         | 1.62                       | 0.0152 | 0.0255 | UP         |
| 45 | SLC4A4      | 1.59                       | 0.0470 | 0.0479 | UP         |
| 46 | ATP2B4      | 1.52                       | 0.0001 | 0.0061 | UP         |

| N  | Gene Symbol | Log2FC           |        |        |      | Regulation | N       | Gene Symbol | Log2FC           |        |      |  | Regulation |
|----|-------------|------------------|--------|--------|------|------------|---------|-------------|------------------|--------|------|--|------------|
|    |             | (CAF/NF)<br>mean | pvalue | FDR    |      |            |         |             | (CAF/NF)<br>mean | pvalue | FDR  |  |            |
| 47 | HS2ST1      | 1.46             | 0.0058 | 0.0177 | UP   | 70         | DDX10   | -1.31       | 0.0170           | 0.0274 | DOWN |  |            |
| 48 | TSHZ1       | 1.46             | 0.0049 | 0.0172 | UP   | 71         | KNDC1   | -1.32       | 0.0300           | 0.0370 | DOWN |  |            |
| 49 | C4orf33     | 1.43             | 0.0236 | 0.0336 | UP   | 72         | PTP4A3  | -1.33       | 0.0259           | 0.0346 | DOWN |  |            |
| 50 | ZNF175      | 1.42             | 0.0019 | 0.0112 | UP   | 73         | SMIM1   | -1.35       | 0.0050           | 0.0172 | DOWN |  |            |
| 51 | TCF4        | 1.39             | 0.0213 | 0.0312 | UP   | 74         | PIP5KL1 | -1.36       | 0.0086           | 0.0205 | DOWN |  |            |
| 52 | TMEM154     | 1.32             | 0.0241 | 0.0340 | UP   | 75         | CYSTM1  | -1.40       | 0.0014           | 0.0112 | DOWN |  |            |
| 53 | POGLUT2     | 1.29             | 0.0326 | 0.0389 | UP   | 76         | SLC35F6 | -1.43       | 0.0266           | 0.0348 | DOWN |  |            |
| 54 | RNF168      | 1.24             | 0.0079 | 0.0203 | UP   | 77         | SLC1A4  | -1.49       | 0.0005           | 0.0109 | DOWN |  |            |
| 55 | SOCS5       | 1.24             | 0.0025 | 0.0117 | UP   | 78         | AZIN2   | -1.50       | 0.0014           | 0.0112 | DOWN |  |            |
| 56 | TMEM50B     | 1.24             | 0.0008 | 0.0112 | UP   | 79         | MTSS2   | -1.54       | 0.0013           | 0.0112 | DOWN |  |            |
| 57 | DOP1A       | 1.23             | 0.0002 | 0.0074 | UP   | 80         | SPATA24 | -1.54       | 0.0071           | 0.0193 | DOWN |  |            |
| 58 | ZHX1        | 1.22             | 0.0344 | 0.0397 | UP   | 81         | LZTS3   | -1.55       | 0.0016           | 0.0112 | DOWN |  |            |
| 59 | IDI1        | 1.20             | 0.0257 | 0.0346 | UP   | 82         | MCRIP2  | -1.57       | 0.0108           | 0.0229 | DOWN |  |            |
| 60 | LSM11       | 1.17             | 0.0145 | 0.0247 | UP   | 83         | UCHL1   | -1.57       | 0.0434           | 0.0460 | DOWN |  |            |
| 61 | KANK1       | 1.16             | 0.0346 | 0.0397 | UP   | 84         | TSTD1   | -1.59       | 0.0297           | 0.0370 | DOWN |  |            |
| 62 | KDELR3      | 1.12             | 0.0055 | 0.0175 | UP   | 85         | ATP2B1  | -1.61       | 0.0493           | 0.0496 | DOWN |  |            |
| 63 | SUPV3L1     | -1.14            | 0.0047 | 0.0172 | DOWN | 86         | ERN1    | -1.62       | 0.0024           | 0.0117 | DOWN |  |            |
| 64 | ROBO3       | -1.15            | 0.0007 | 0.0112 | DOWN | 87         | BRSK1   | -1.63       | 0.0069           | 0.0193 | DOWN |  |            |
| 65 | TMEM54      | -1.16            | 0.0011 | 0.0112 | DOWN | 88         | EMC9    | -1.63       | 0.0025           | 0.0117 | DOWN |  |            |
| 66 | USE1        | -1.20            | 0.0054 | 0.0175 | DOWN | 89         | FGF21   | -1.63       | 0.0448           | 0.0468 | DOWN |  |            |
| 67 | P3H2        | -1.24            | 0.0182 | 0.0284 | DOWN | 90         | DMWD    | -1.65       | 0.0019           | 0.0112 | DOWN |  |            |
| 68 | SLC25A4     | -1.26            | 0.0142 | 0.0247 | DOWN | 91         | HES7    | -1.65       | 0.0089           | 0.0206 | DOWN |  |            |
| 69 | FUOM        | -1.28            | 0.0010 | 0.0112 | DOWN | 92         | APBA2   | -1.68       | 0.0115           | 0.0231 | DOWN |  |            |

| N   | Gene Symbol | Log2FC           |        |        |            |
|-----|-------------|------------------|--------|--------|------------|
|     |             | (CAF/NF)<br>mean | pvalue | FDR    | Regulation |
| 93  | TMEM156     | -1.68            | 0.0163 | 0.0268 | DOWN       |
| 94  | H1-0        | -1.70            | 0.0049 | 0.0172 | DOWN       |
| 95  | SIX2        | -1.71            | 0.0055 | 0.0175 | DOWN       |
| 96  | TP53        | -1.71            | 0.0163 | 0.0268 | DOWN       |
| 97  | AIFM2       | -1.75            | 0.0017 | 0.0112 | DOWN       |
| 98  | BCL2L1      | -1.75            | 0.0016 | 0.0112 | DOWN       |
| 99  | IDNK        | -1.75            | 0.0038 | 0.0161 | DOWN       |
| 100 | RRAD        | -1.75            | 0.0011 | 0.0112 | DOWN       |
| 101 | SNTB1       | -1.76            | 0.0255 | 0.0346 | DOWN       |
| 102 | DDIT3       | -1.77            | 0.0129 | 0.0239 | DOWN       |
| 103 | RAB33A      | -1.77            | 0.0020 | 0.0112 | DOWN       |
| 104 | GADD45A     | -1.83            | 0.0383 | 0.0427 | DOWN       |
| 105 | GSTO2       | -1.84            | 0.0203 | 0.0305 | DOWN       |
| 106 | REEP2       | -1.84            | 0.0115 | 0.0231 | DOWN       |
| 107 | CDKN3       | -1.85            | 0.0470 | 0.0479 | DOWN       |
| 108 | ETV5        | -1.86            | 0.0074 | 0.0196 | DOWN       |
| 109 | ITPR1       | -1.86            | 0.0244 | 0.0342 | DOWN       |
| 110 | LYL1        | -1.86            | 0.0122 | 0.0233 | DOWN       |
| 111 | DNAJA4      | -1.88            | 0.0023 | 0.0117 | DOWN       |
| 112 | UNC5B       | -1.88            | 0.0048 | 0.0172 | DOWN       |
| 113 | CYB5R2      | -1.89            | 0.0279 | 0.0357 | DOWN       |
| 114 | PECR        | -1.91            | 0.0119 | 0.0233 | DOWN       |
| 115 | CTPS1       | -1.93            | 0.0316 | 0.0383 | DOWN       |

| N   | Gene Symbol | Log2FC           |        |        |            |
|-----|-------------|------------------|--------|--------|------------|
|     |             | (CAF/NF)<br>mean | pvalue | FDR    | Regulation |
| 116 | FAM24B      | -1.94            | 0.0120 | 0.0233 | DOWN       |
| 117 | DLL3        | -1.97            | 0.0006 | 0.0112 | DOWN       |
| 118 | TRIB3       | -1.99            | 0.0146 | 0.0247 | DOWN       |
| 119 | CLDN7       | -2.02            | 0.0134 | 0.0242 | DOWN       |
| 120 | SDSL        | -2.06            | 0.0027 | 0.0124 | DOWN       |
| 121 | UBE2S       | -2.06            | 0.0088 | 0.0205 | DOWN       |
| 122 | AJUBA       | -2.14            | 0.0412 | 0.0445 | DOWN       |
| 123 | PODXL2      | -2.14            | 0.0123 | 0.0233 | DOWN       |
| 124 | MROH8       | -2.15            | 0.0018 | 0.0112 | DOWN       |
| 125 | CALHM6      | -2.17            | 0.0387 | 0.0427 | DOWN       |
| 126 | ZP3         | -2.17            | 0.0261 | 0.0346 | DOWN       |
| 127 | KCNG1       | -2.20            | 0.0044 | 0.0167 | DOWN       |
| 128 | PRR11       | -2.20            | 0.0468 | 0.0479 | DOWN       |
| 129 | NUDT14      | -2.22            | 0.0117 | 0.0233 | DOWN       |
| 130 | RAB39B      | -2.22            | 0.0095 | 0.0212 | DOWN       |
| 131 | SH3BGR      | -2.22            | 0.0397 | 0.0435 | DOWN       |
| 132 | SLC7A5      | -2.22            | 0.0092 | 0.0208 | DOWN       |
| 133 | TMEM255B    | -2.30            | 0.0402 | 0.0437 | DOWN       |
| 134 | PLK1        | -2.32            | 0.0459 | 0.0477 | DOWN       |
| 135 | DPYSL4      | -2.33            | 0.0348 | 0.0397 | DOWN       |
| 136 | FRY         | -2.33            | 0.0081 | 0.0203 | DOWN       |
| 137 | HES6        | -2.37            | 0.0012 | 0.0112 | DOWN       |
| 138 | RASIP1      | -2.38            | 0.0073 | 0.0195 | DOWN       |

---

| N   | Gene Symbol | Log2FC           | pvalue | FDR    | Regulation |
|-----|-------------|------------------|--------|--------|------------|
|     |             | (CAF/NF)<br>mean |        |        |            |
| 139 | C2CD3       | -2.48            | 0.0041 | 0.0166 | DOWN       |
| 140 | MFSD13A     | -2.52            | 0.0001 | 0.0061 | DOWN       |
| 141 | CHST7       | -2.54            | 0.0112 | 0.0231 | DOWN       |
| 142 | CCL2        | -2.56            | 0.0374 | 0.0421 | DOWN       |
| 143 | MKX         | -2.56            | 0.0143 | 0.0247 | DOWN       |
| 144 | C19orf81    | -2.64            | 0.0189 | 0.0290 | DOWN       |
| 145 | CCR10       | -2.68            | 0.0174 | 0.0276 | DOWN       |
| 146 | CDH4        | -2.75            | 0.0175 | 0.0276 | DOWN       |
| 147 | PPME1       | -2.79            | 0.0042 | 0.0166 | DOWN       |
| 148 | TPD52L1     | -2.97            | 0.0137 | 0.0245 | DOWN       |
| 149 | OSCAR       | -3.00            | 0.0104 | 0.0226 | DOWN       |
| 150 | SPX         | -3.03            | 0.0199 | 0.0302 | DOWN       |
| 151 | NKX3-2      | -3.07            | 0.0040 | 0.0163 | DOWN       |
| 152 | CHST2       | -3.25            | 0.0106 | 0.0228 | DOWN       |
| 153 | CYP3A7      | -3.39            | 0.0065 | 0.0190 | DOWN       |
| 154 | ATP1A2      | -3.46            | 0.0323 | 0.0388 | DOWN       |
| 155 | ATF3        | -3.47            | 0.0055 | 0.0175 | DOWN       |
| 156 | GDF15       | -3.50            | 0.0004 | 0.0095 | DOWN       |
| 157 | B3GALT2     | -3.52            | 0.0346 | 0.0397 | DOWN       |
| 158 | BEX1        | -3.53            | 0.0067 | 0.0193 | DOWN       |
| 159 | C1orf115    | -3.84            | 0.0028 | 0.0124 | DOWN       |
| 160 | UCP2        | -4.20            | 0.0070 | 0.0193 | DOWN       |
| 161 | BEX2        | -4.96            | 0.0011 | 0.0112 | DOWN       |

---
